# Supplementary material for: The Association Between C24:0/C16:0 Ceramide Ratio and Cardiorespiratory Fitness is Robust to Effect Modifications by Age and Sex
Source: PubMed Central journal article supplement — Adv Biol (Weinh). Author manuscript; Available in PMC 2024 Jun 4. (PMC11149399; doi:10.1002/adbi.202300633), 2024-02-11

# ADVANCED BIOLOGY

## Supporting Information

for *Adv. Biology*, DOI 10.1002/adbi.202300633

The Association Between C24:0/C16:0 Ceramide Ratio and Cardiorespiratory Fitness is Robust to Effect Modifications by Age and Sex

*Jule Zatloukal, Stephanie Zylla, Marcello R.P. Markus, Ralf Ewert, Sven Gläser, Henry Völzke, Diana Albrecht, Nele Friedrich, Matthias Nauck, Linda R. Peterson, Xuntian Jiang, Jean E. Schaffer, Stephan B. Felix, Marcus Dörr, Martin Bahls and Stefan Gross\**

## SUPPLEMENTAL MATERIAL

Supplemental Figure S1: Sample flowchart.

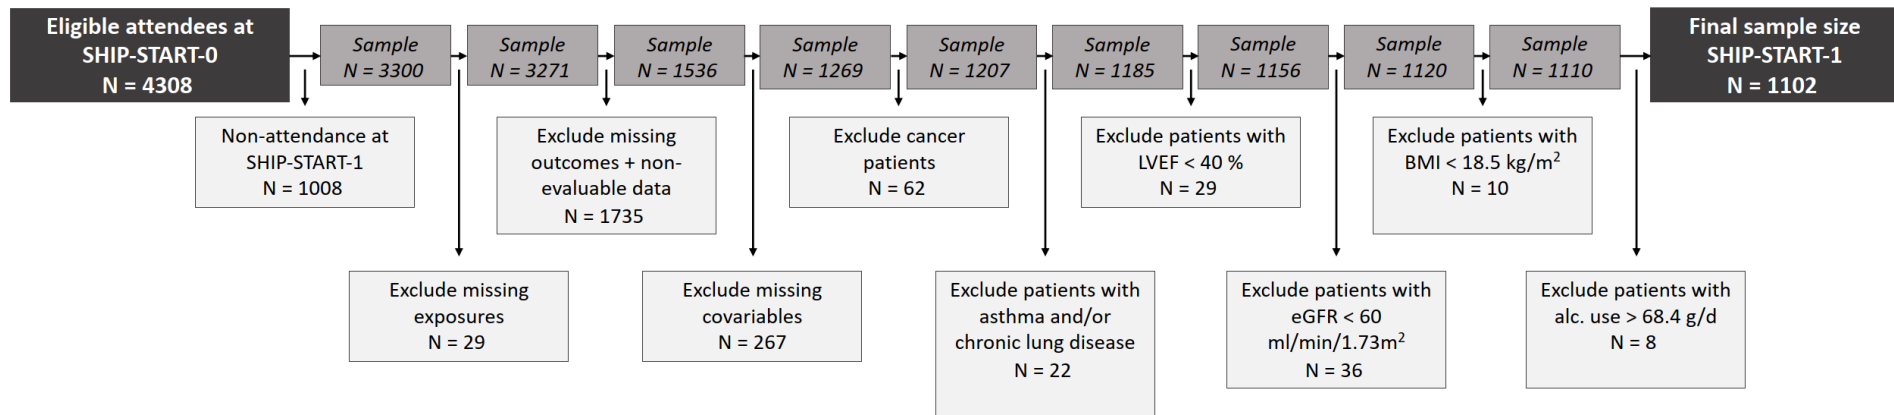

**Supplemental Figure S2: Directed acyclic graph to justify the minimal sufficient confounder set for  $full_1$  and  $full_2$ .**

*Cer* = ceramides, *CRF* = cardiorespiratory fitness, *Educ.* = education status, *Smok.* = current smoking status, *BMI* = body mass index, *PA* = physical activity, *T2DM* = type 2 diabetes mellitus, *HypT* = arterial hypertension, *BetaBL* = intake of beta blocker, *Lipids* = triglycerides + LDL/TotalCholesterol ratio ( $full_1$ ) or triglycerides + non-HDL ( $full_2$ ), *LLM* = intake of lipid-lowering medication.

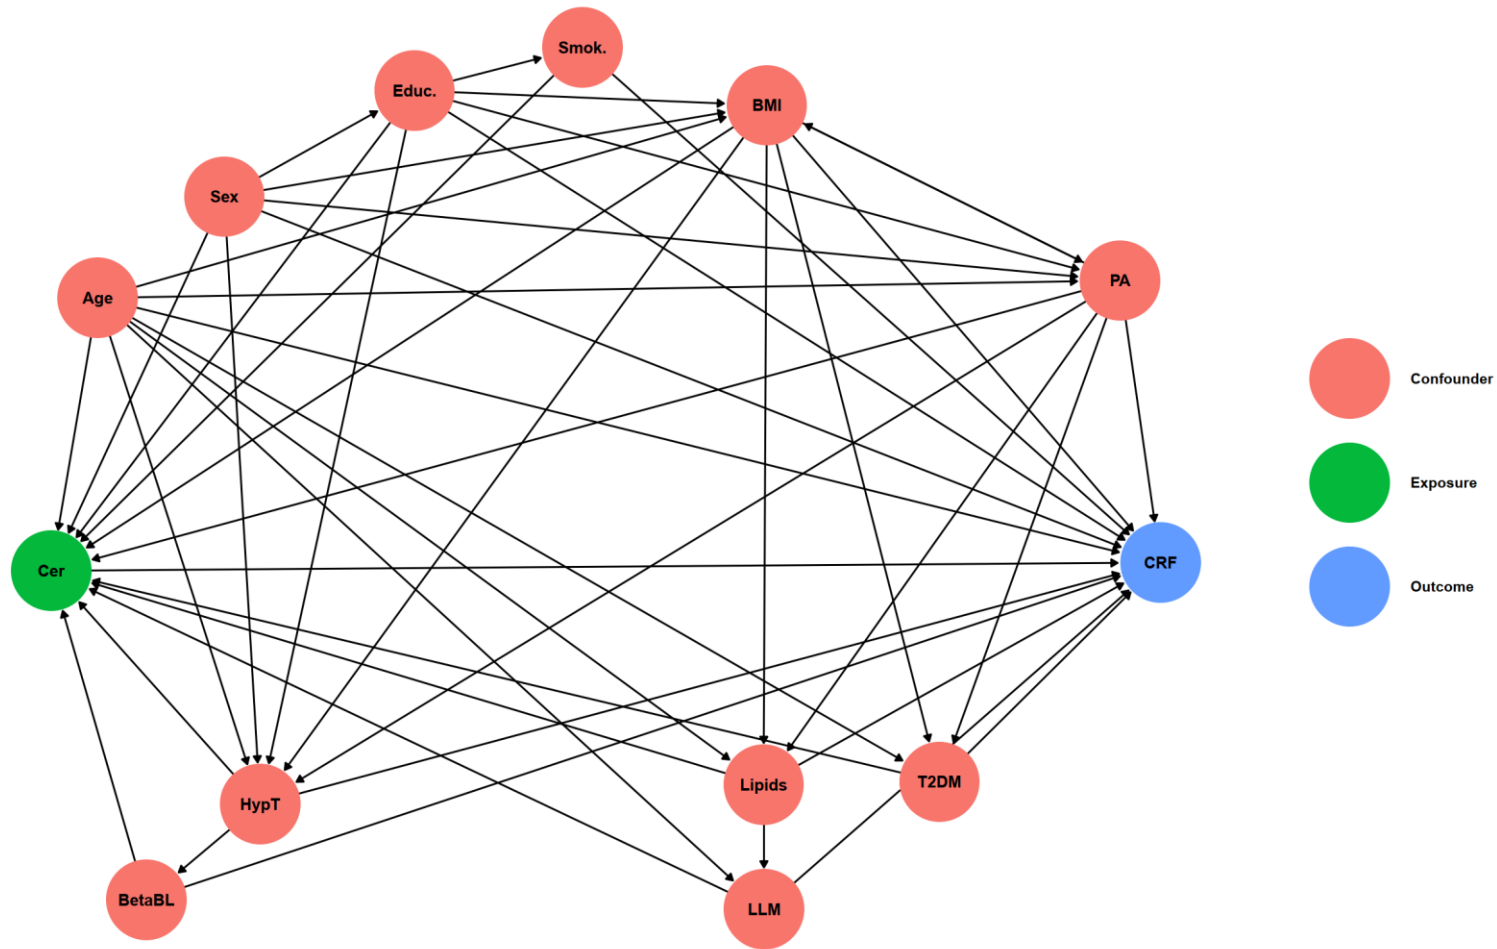

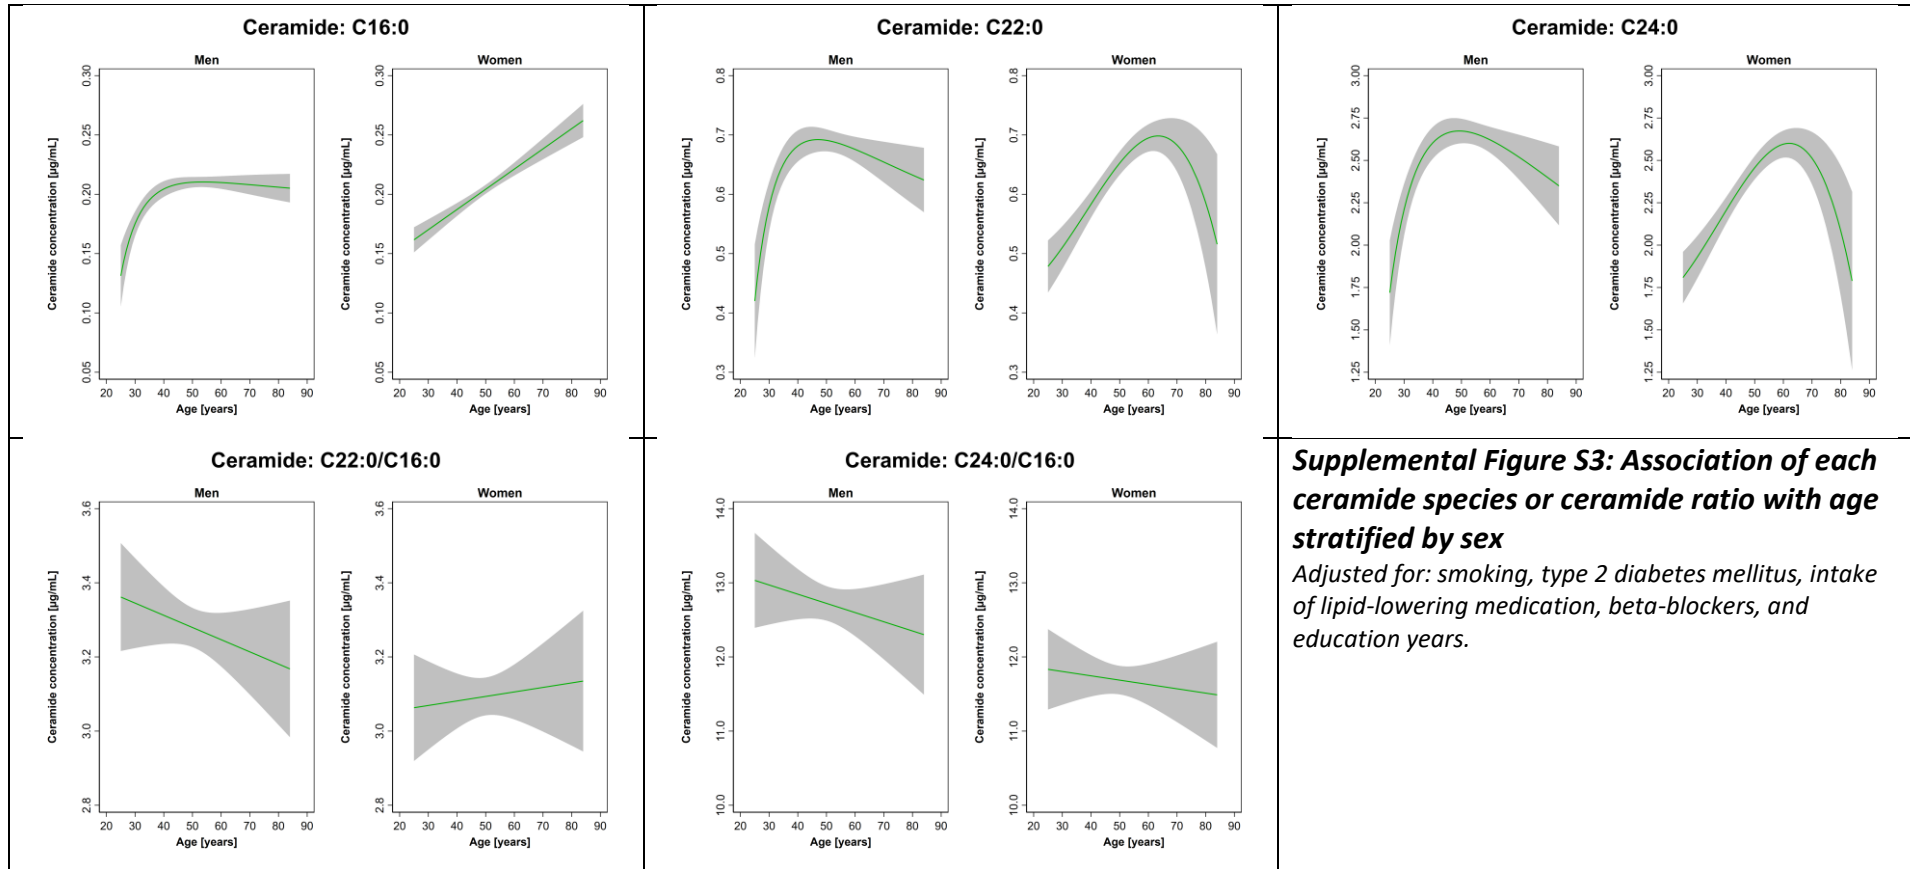

**Supplemental Figure S4: Association of each ceramide species and ceramide ratio with age stratified by sex.**

*Adjusted for: smoking, type 2 diabetes mellitus, intake of lipid-lowering medication, beta-blockers, and education years.*

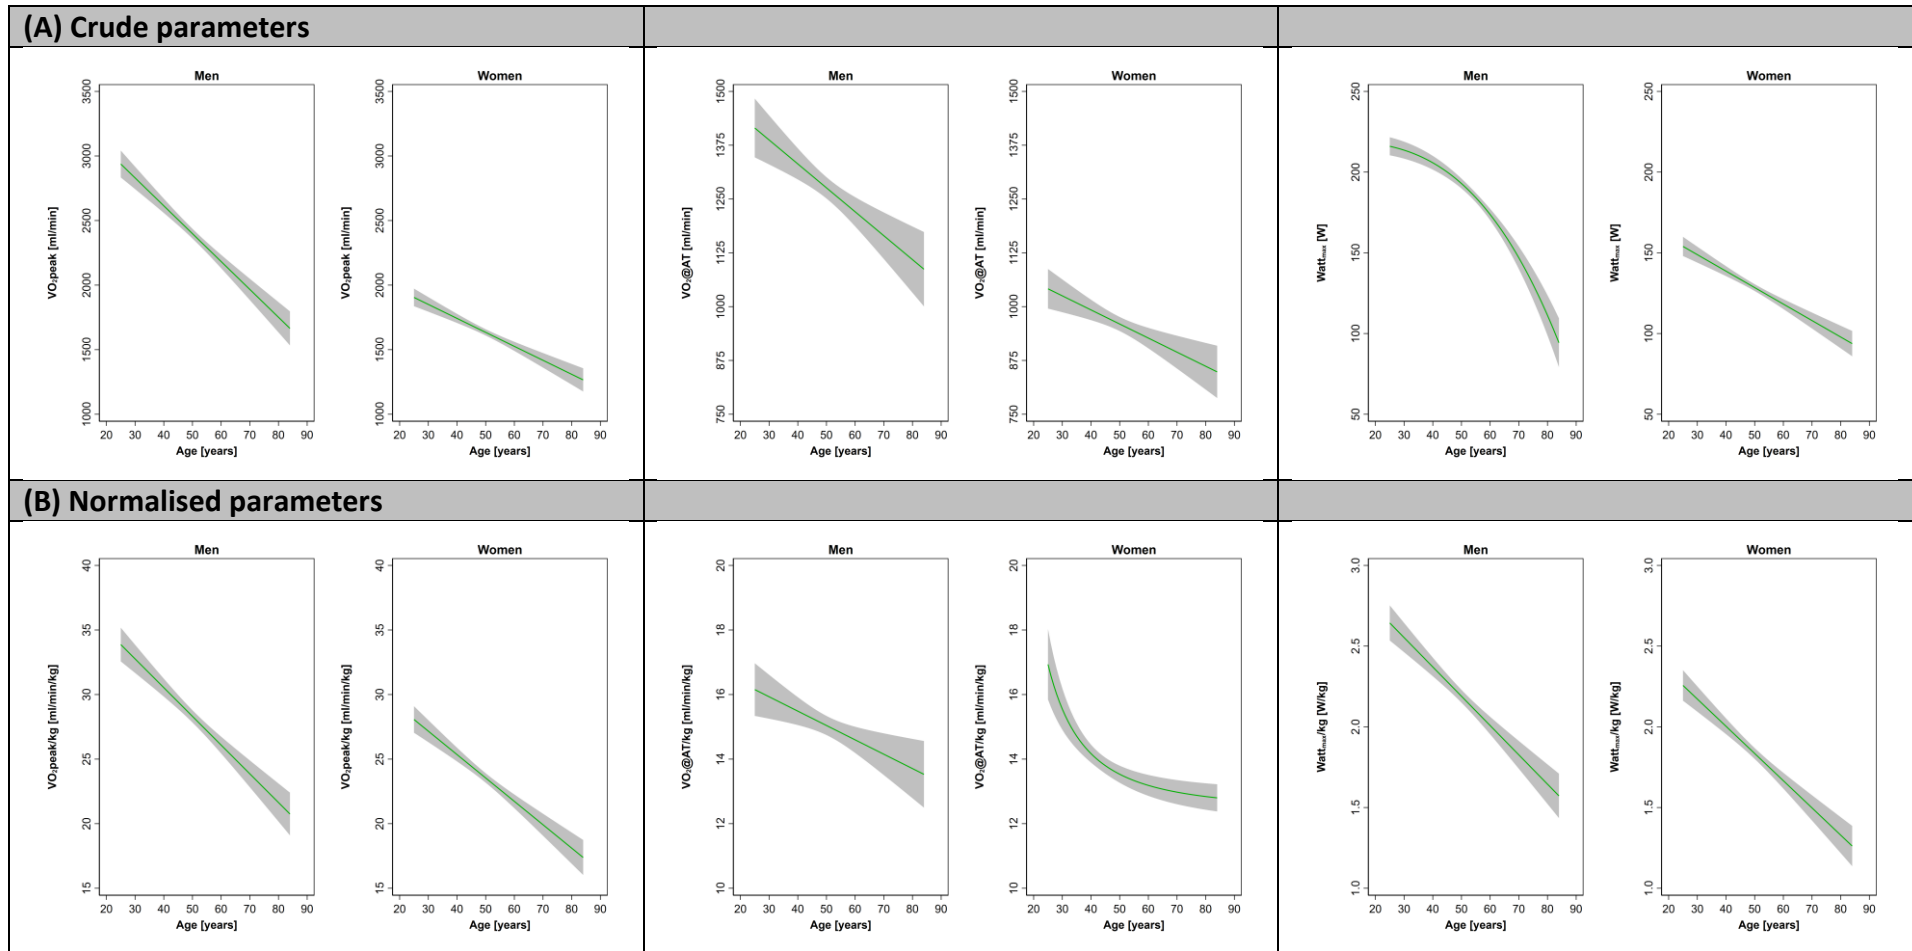

Supplement: NIHMS1997303-supplement-Supp__Materials_Figures_S1-S4.pdf [file NIHMS1997303-supplement-Supp__Materials_Figures_S1-S4.pdf]
